# Supplementary material for: Prediction Accuracy of Serial Lung Ultrasound in COVID-19 Hospitalized Patients (Pred-Echovid Study)
Source: MDPI journal article supplement (doi:10.3390/jcm10214818), 2021-10-20

**Table S1.** Number of patients included in each research center and ultrasound machine used.

| <b>Hospital</b>              | <b>Numer of patients included</b> | <b>Ultrasound machine</b>           |
|------------------------------|-----------------------------------|-------------------------------------|
| <b>Infanta Leonor UH</b>     | 151                               | Butterfly inc, / Esaote Mylab gamma |
| <b>Infanta Cristina UH</b>   | 134                               | Esaote Mylab alpha                  |
| <b>Doce de Octubre UH</b>    | 103                               | Phillips Lumify                     |
| <b>La Paz UH</b>             | 34                                | GE Venue ultrasound system          |
| <b>Virgen del Rocio UH</b>   | 21                                | Butterfly inc                       |
| <b>Isabel Zendal</b>         | 14                                | GE Venue ultrasound system          |
| <b>Clinico San Carlos UH</b> | 7                                 | Butterfly inc                       |

**Figure S1:** Lung ultrasound score images.

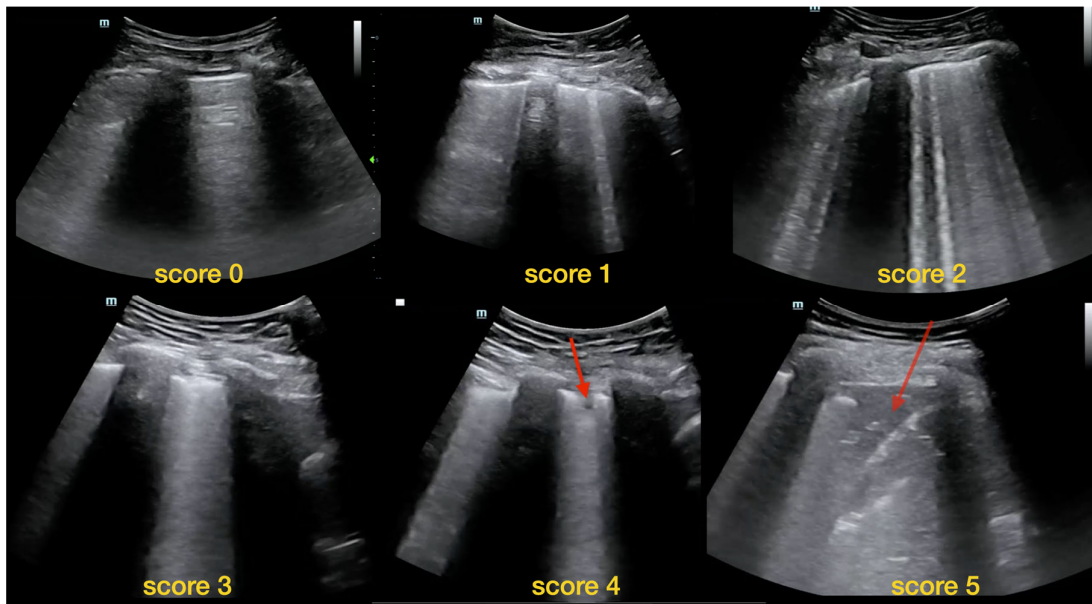

**Figure S2.** Calibration curve of predicted main end-point (orotracheal intubation or death) risk by SCORE-1 (point-of-care ultrasonographic score obtained during the first 24 hours of hospital stay) in a multicenter cohort of in-hospital patients with COVID-19 from Spain.

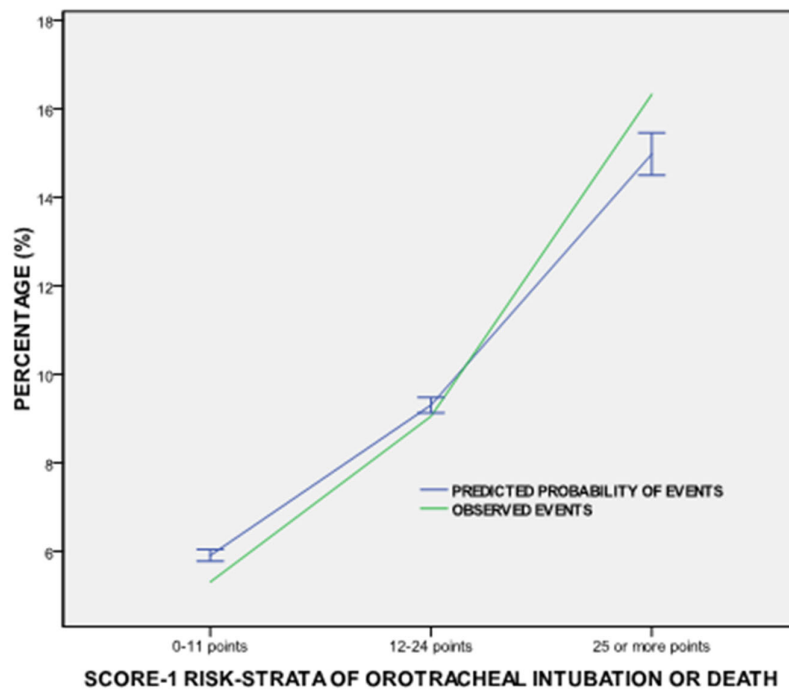

**Figure S3.** Calibration curve of predicted main end-point (oro-tracheal intubation or death) risk by SCORE-2 (point-of-care ultrasonographic score obtained after 72 hours and before 96 hours of hospital stay) in a multicenter cohort of in-hospital patients with COVID-19 from Spain.

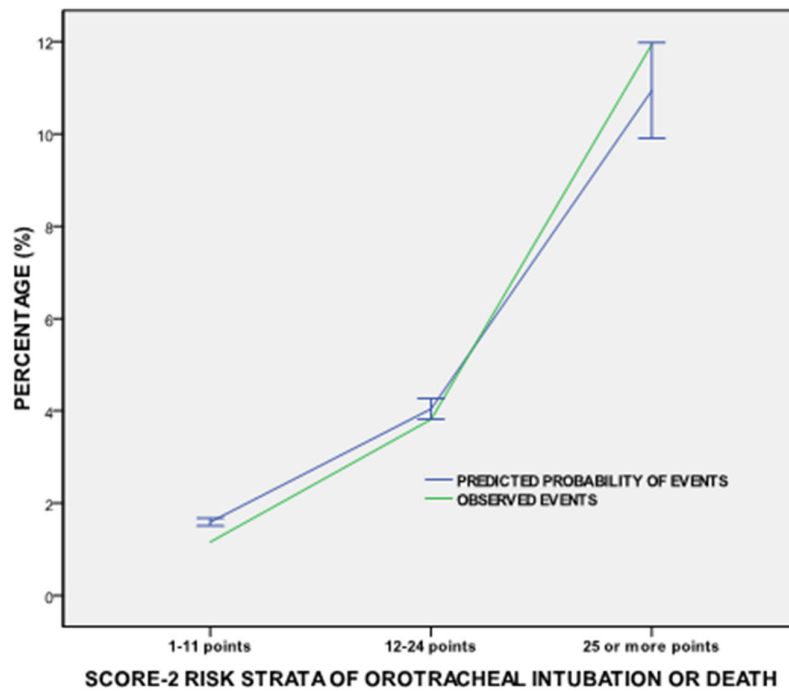

**Figure S4.** Calibration curve of predicted main end-point (orotracheal intubation or death) risk by DIFFERENTIAL SCORE (difference between SCORE-2 and SCORE-1) in a multicenter cohort of in-hospital patients with COVID-19 from Spain.

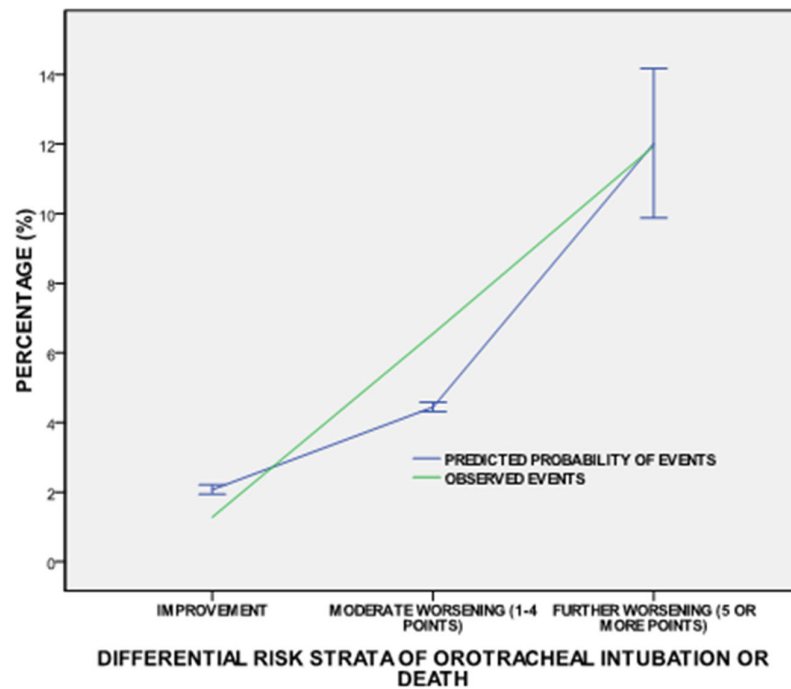

Supplement: s1 [file s1]
